# Supplementary material
Source: Springer Nature journal article supplement (https://www.springermedizin.de/resource/supplementary/13054_2014_2474_MOESM4_ESM.pdf/9714182)
Supplement: MOESM4 [file 9714182]

**RECORDS IDENTIFIED THROUGH DATABASE SEARCHING**

MEDLINE = 6

EMBASE = 71

LILACS = 3

ISI Web of Science = 66

***N* = 146**

DUPLICATES REMOVED

*N* = 9

**TITLES AND ABSTRACTS SCREENED**

***N* = 137**

RECORDS EXCLUDED FROM TITLE/ABSTRACT

*N* = 118

**FULL-TEXT ARTICLES ASSESSED FOR ELIGIBILITY**

***N* = 19**

FULL-TEXT ARTICLES EXCLUDED

*N* = 6

**INITIAL STUDIES INCLUDED**

***N* = 13**

STUDIES INCLUDED AFTER ANALYSIS OF REFERENCE  
LISTS

*N* = 1

**TOTAL STUDIES INCLUDED**

***N* = 14**
